# Supplementary material for: Identification and Analysis of the MIR399 Gene Family in Grapevine Reveal Their Potential Functions in Abiotic Stress
Source: MDPI journal article supplement (doi:10.3390/ijms25052979), 2024-03-04
Supplement: s1 [file s1]

|                        |                                                                                                                                                                                                                                                        |
|------------------------|--------------------------------------------------------------------------------------------------------------------------------------------------------------------------------------------------------------------------------------------------------|
| Control<br>Vvi-MIR399a | GAGAATAACAGTGTGATTCTCCTTTGGCAGAGATATCAGCATGGAGTAGAAGGCGGTAGCTGCTCTGCCAAAGGAGAATTGCCCTGTTATTCAATT<br>GAGAATAACAGTGTGATTCTCCTTTGGCAGAGATATCAGCATGGAGTAGAAGGCGGTAGCTGCTCTGCCAAAGGAGAATTGCCCTGTTATTCAATT                                                   |
| Control<br>Vvi-MIR399b | ATCAATCATAGGGCACCTCTTTCTTTGGCAGGCACTGGCTCCTATATATGAATATACATAGCTTAGCTGCAGTA<br>ATCAATCATAGGGCACCTCTTTCTTTGGCAGGCACTGGCTCCTATATATGAATATACATAGCTTAGCTGCAGTA                                                                                               |
| Control<br>Vvi-MIR399c | ACCGGCTCTCAGGGCCTCTTTACCTTTGGTAGGTGACATAGATGTGAATGATCTGCCAAAGGAGAGTTGCCCTGTGTCTGGTTA<br>ACCGGCTCTCAGGGCCTCTTTACCTTTGGTAGGTGACATAGATGTGAATGATCTGCCAAAGGAGAGTTGCCCTGTGTCTGGTTA                                                                           |
| Control<br>Vvi-MIR399d | GTAAATTATAGAGCAGATTCTTTTGGCAGATGGCGATCACAGCCAATGTCTCAAAGGGCAATTGAGTGTGTCTGCCAAAGGAGATTGCTCGTGAATTTAACT<br>GTAAATTATAGAGCAGATTCTTTTGGCAGATGGCGATCACAGCCAATGTCTCAAAGGGCAATTGAGTGTGTCTGCCAAAGGAGATTGCTCGTGAATTTAACT                                       |
| Control<br>Vvi-MIR399e | GCATATTACAGGGCAAAATTATCTTTTGGCAGGCAGCCACTTAGAGACACAGCCAAGCCATGCATTCTGTAGTGTGCCCTCTGCCAAAGGAGATTGCCCGGCAATTCTTCT<br>GCATATTACAGGGCAAAATTATCTTTTGGCAGGCAGCCACTTAGAGACACAGCCAAGCCATGCATTCTGTAGTGTGCCCTCTGCCAAAGGAGATTGCCCGGCAATTCTTCT                     |
| Control<br>Vvi-MIR399f | GTTGCATTAGAGGGCCAAATCTGCTTTGGCATGAAGCCATTAGCAGGCTCGTCTGTGTCTGCAGTCTTCTCGCTGCCAAGGAGATTGTCCTGCAATTTCTTCTG<br>GTTGCATTAGAGGGCCAAATCTGCTTTGGCATGAAGCCATTAGCAGGCTCGTCTGTGTCTGCAGTCTTCTCGCTGCCAAGGAGATTGTCCTGCAATTTCTTCTG                                   |
| Control<br>Vvi-MIR399g | ATGAATTGCTGGGCAATCTCCATTGGCAGTTGGCCACTCGGCTGACCGCGGTGACTTCACAAGTAGCAGACTAAGCTCACTGCCAAAGGAGATTGCCCTCAATTGAGGT<br>ATGAATTGCTGGGCAATCTCCATTGGCAGTTGGCCACTCGGCTGACCGCGGTGACTTCACAAGTAGCAGACTAAGCTCACTGCCAAAGGAGATTGCCCTCAATTGAGGT                         |
| Control<br>Vvi-MIR399h | AGGAATAACAGTGCAATCTCCTTTGGCAGAAAGATCATGCACATGCATCTCTGTTTTGCCAAAGGAGAATTGCCCTGCCATTGCTG<br>AGGAATAACAGTGCAATCTCCTTTGGCAGAAAGATCATGCACATGCATCTCTGTTTTGCCAAAGGAGAATTGCCCTGCCATTGCTG                                                                       |
| Control<br>Vvi-MIR399i | AGTAGTTGTAGGGCTTCTCTCCTTCTGGCAGGAGATGGCAATAGATTATCCTTTGTGGCTTATCTCCGGTGTGATTAACTTCCAATGACCCGCCAAAGGAGAGTTGCCCTGTGACTACTTG<br>AGTAGTTGTAGGGCTTCTCTCCTTCTGGCAGGAGATGGCAATAGATTATCCTTTGTGGCTTATCTCCGGTGTGATTAACTTCCAATGACCCGCCAAAGGAGAGTTGCCCTGTGACTACTTG |

**Figure S1** *MIR399* gene family sequence alignment in ‘Thompson Seedless’ grapevine and the miRBase database. Control and *Vvi-MIR399* represent miRBase database and ‘Thompson Seedless’ grapevine, respectively.
