# Supplementary material for: Identification and Analysis of the MIR399 Gene Family in Grapevine Reveal Their Potential Functions in Abiotic Stress
Source: Int J Mol Sci. 2024 Mar 4;25(5):2979. doi: 10.3390/ijms25052979 (PMC10931670; doi:10.3390/ijms25052979)
Supplement: Supplementary file 1 [file ijms-25-02979-s001.zip › Supplemental Table.xlsx]

## Sheet: Table S1
Table S1 Mature and precursor sequence information for grapevine Vvi-miR399 gene family.
Vvi-miR399 gene family	Precursor sequences (5’-3’)	Length (nt)	Mature sequences (5’-3’)	Length (nt)	Sequencing results of precursor sequences (5’-3’)	Length (nt)
Vvi-miR399a	GAGAAUAACAGUGUGAUUCUCCUUUGGCAGAGAUAUCACGCAUGGAGUAGAAGGCGGUAGCUGCUCUGCCAAAGGAGAAUUGCCCUGUUAUUCAAUU	97	UGCCAAAGGAGAAUUGCCCUG	21	GAGAAUAACAGUGUGAUUCUCCUUUGGCAGAGAUAUCAUGCAUGGAGUAGAAGGCGGUAGCUGCUCUGCCAAAGGAGAAUUGCCCUGUUAUUCAAUU	97
Vvi-miR399b	AUCAAUCAUAGGGCACCUCUUUCUUGGCAGGCACUGGCUCCUAUAUAUGAAUAUACAUAGCUUAGCUGCAGUAAAAAGAUGUGACUUGCCAAAGGAGAGUUGCCCUGUGACUGCUUC	117	UGCCAAAGGAGAGUUGCCCUG	21	AUCAAUCAUAGGGCACCUCUUUCUUGGCAGGCAGUGGCUCCUAUAUAUGAAUAUACAUAGCUUAGCUGCAGUAUAAAGAUGUGACUUGCCAAAGGAGAGUUGCCCUGUGACUGCUUC	117
Vvi-miR399c	ACCGGUCUCAGGGCCUCUUUCACUUGGUAGGUGACAUAGAUGUGAAUGAUCUGCCAAAGGAGAGUUGCCCUGUGUCUGGUUA	82	UGCCAAAGGAGAGUUGCCCUG	21	ACCGGUCUCAGGGCCUCUUUCACUUGGUAGGUGACAUAGAUGUGAAUGAUCUGCCAAAGGAGAGUUGCCCUGUGUCUGGUUA	82
Vvi-miR399d	GUAAAUUAUAGAGCAGAUUUCUUUUGGCAGAUGGCGAUCACAAGCCAAUGUGCUCAAAGGGCAUUGAGUGUGUCUGCCAAAGGAGAUUUGCUCGUGAAUUUAACU	105	UGCCAAAGGAGAUUUGCUCGU	21	GUAAAUUAUAGAGCAGAUUUCUUUUGGCAGAUGGCGAUCACAAGCCAAUGUGUUCAAAGGGCAUUGAGUGUGUCUGCCAAAGGAGAUUUGCUCGUGAAUUUAACU	105
Vvi-miR399e	GCAUAUUACAGGGCAAAUUAUCUUUUGGCAGGCAGCCACUUAGAGACACAGCCAAGCCAUGCAUUCUUGUAGUGUGCCCUCUGCCAAAGGAGAUUUGCCCGGCAAUUCUUCU	112	UGCCAAAGGAGAUUUGCCCGG	21	GCAUAUUACAGGGCAAAUUAUCUUUUGGCAGGCAGCCACUUAGAGACACAGCCAAGCCAUGCAUUCUUGUAGUGUGCCCUCUGCCAAAGGAGAUUUGCCCGGCAAUUCUUCU	112
Vvi-miR399f	GUUGCAUUAGAGGGCCAAAUCUGCUUUGGCAUGAAGCCCAUUUAGCAGGCUCGUCUGUGUCUGCAGUCUUCUCGCUGCCGAAGGAGAUUUGUCCUGCAAUUCUUCUG	107	UGCCGAAGGAGAUUUGUCCUG	21	GUUGCAUUAGAGGGCCAAAUCUGCUUUGGCAUGAAGCCCAUUUAGCAGGCUCGUCUGUGUCUGCAGUCUUCUCGCUGCCGAAGGAGAUUUGUCCUGCAAUUCUUCUG	107
Vvi-miR399g	AUGAAUUGCUGGGCAAUACUCCAUUGGCAGUUGGCCACUCGGCUGACCGCGGUUGACUUCACAAGUAGCAGACUAAGCUCACUGCCAAAGGAGAUUUGCCCCUCAAUUCAGCU	113	UGCCAAAGGAGAUUUGCCCCU	21	AUGAAUUGCUGGGCAAUACUCCAUUGGCAGUUGGCCACUCGGCUGACCGCGGUUGACUUCACAAGUAGCAGACUAAGCUCACUGCCAAAGGAGAUUUGCCCCUCAAUUCAGCU	113
Vvi-miR399h	AGGAAUAACAGUGCAAUCCUCCUUUGGCAGAAAGAUCAUGCACAUGCAUACUUCUGUUUUGCCAAAGGAGAAUUGCCCUGCCAUUCGCUC	90	UGCCAAAGGAGAAUUGCCCUG	21	AGGAAUAACAGUGCAAUCCUCCUUUGGCAGAAAGAUCAUGCACAUGCAUACUUCUGUUUUGCCAAAGGAGAAUUGCCCUGCCAUUCGCUC	90
Vvi-miR399i	AGUAGUUGUAGGGCUUCUCUCCUUCUGGCAGGAGAUGGCAAUAGAUUAUCCUUUGUGGCUUAUCUCCGGUGUUGAUUAACUUCCAAUGACCCGCCAAAGGAGAGUUGCCCUGUGACUACUUC	122	CGCCAAAGGAGAGUUGCCCUG	21	AGUAGUUGUAGGGCUUCUCUCCUUCUGGCAGGAGAUGGCAAUAGAUUAUCCUUUGUGGCUUAUCUCCGGUGUUGAUUAACUUCCAAUGACCCGCCAAAGGAGAGUUGCCCUGUGACUACUUC	122

## Sheet: Table S2
Table S2 Sequence primer for Vvi-MIR399 gene family
Gene name	Sequence primer (5’- 3’)
Vvi-MIR399a_F	GAGAATAACAGTGTGATTCTCCTT
Vvi-MIR399a_R	AATTGAATAACAGGGCAATTCTCC
Vvi-MIR399b_F	ATCAATCATAGGGCACCTCTTTC
Vvi-MIR399b_R	GAAGCAGTCACAGGGCAACT
Vvi-MIR399c_F	ACCGGTCTCAGGGCCTCTT
Vvi-MIR399c_R	TAACCAGACACAGGGCAACTC
Vvi-MIR399d_F	GTAAATTATAGAGCAGATTTCTTTTGG
Vvi-MIR399d_R	AGTTAAATTCACGAGCAAATCTCCTT
Vvi-MIR399e_F	GCATATTACAGGGCAAATTATCTT
Vvi-MIR399e_R	AGAAGAATTGCCGGGCAAATCT
Vvi-MIR399f_F	GTTGCATTAGAGGGCCAAATC
Vvi-MIR399f_R	CAGAAGAATTGCAGGACAAATC
Vvi-MIR399g_F	ATGAATTGCTGGGCAATACTCC
Vvi-MIR399g_R	AGCTGAATTGAGGGGCAAATCT
Vvi-MIR399h_F	AGGAATAACAGTGCAATCCTCC
Vvi-MIR399h_R	GAGCGAATGGCAGGGCAATT
Vvi-MIR399i_F	AGTAGTTGTAGGGCTTCTCTC
Vvi-MIR399i_R	GAAGTAGTCACAGGGCAACT

## Sheet: Table S3
Table S3 Chromosomal localization information of the MIR399 gene family in the grapevine.
Vvi-MIR399 gene family	Chromosome	Start	End	Strand
Vvi-MIR399a	Vvi-chr10	2989440	2989556	+
Vvi-MIR399b	Vvi-chr16	15618698	15618834	-
Vvi-MIR399c	Vvi-chr15	15232190	15232291	+
Vvi-MIR399d	Vvi-chr10	2988013	2988133	-
Vvi-MIR399e	Vvi-chr10	2992210	2992341	-
Vvi-MIR399f	Vvi-chr10	2978760	2978949	-
Vvi-MIR399g	Vvi-chr10	2981237	2981369	-
Vvi-MIR399h	Vvi-chr10	2983584	2983688	+
Vvi-MIR399i	Vvi-chr2	4101791	4101932	+

## Sheet: Table S4
Table S4 Promoter analysis of the MIR399 family in grapevine
category	Motif	Function	Vvi-MIR399a	Vvi-MIR399b	Vvi-MIR399c	Vvi-MIR399d	Vvi-MIR399e	Vvi-MIR399f	Vvi-MIR399g	Vvi-MIR399h	Vvi-MIR399i
Enhancer and core element	CAAT-box	common cis-acting element in promoter and enhancer regions	14	10	9	13	8	20	10	11	14
	TATA-box	core promoter element around -30 of transcription start	48	58	34	43	54	36	50	44	30
Light-related elements	G-box	cis-acting regulatory element involved in light responsiveness	0	1	1	0	0	2	1	1	0
	3-AF1 binding site	light responsive element	0	0	0	0	0	0	0	0	1
	GT1-motif	light responsive element	2	3	1	1	1	2	3	3	1
	MRE	MYB binding site involved in light responsiveness	0	1	1	0	0	2	0	0	0
	ATC-motif	part of a conserved DNA module involved in light responsiveness	0	0	0	0	1	0	0	0	0
	ATCT-motif	part of a conserved DNA module involved in light responsiveness	0	1	0	1	0	1	0	0	0
	Box 4	part of a conserved DNA module involved in light responsiveness	1	4	0	2	0	2	4	4	1
	chs-CMA2a	part of a light responsive element	0	0	0	0	0	0	2	1	0
	GATA-motif	part of a light responsive element	0	2	1	1	0	0	0	0	0
	GATT-motif	part of a light responsive element	0	0	0	0	0	0	1	1	1
	GTGGC-motif	part of a light responsive element	0	0	0	0	1	0	0	0	0
	I-box	part of a light responsive element	3	1	0	3	1	0	2	3	0
	LAMP-element	part of a light responsive element	1	0	0	1	0	1	0	1	0
	sbp-CMA1c	part of a light responsive element	0	0	0	0	1	0	0	0	0
	TCCC-motif	part of a light responsive element	2	0	0	0	0	1	1	0	0
	TCT-motif	part of a light responsive element	1	0	0	1	0	1	1	1	1
	AE-box	part of a module for light response	0	0	0	1	1	0	1	1	0
Defense-related elements	TC-rich repeats	cis-acting element involved in defense and stress responsiveness	0	1	0	0	0	0	0	0	1
	LTR	cis-acting element involved in low-temperature responsiveness	0	2	0	0	0	0	0	0	0
	ARE	cis-acting regulatory element essential for the anaerobic induction	0	0	2	2	1	1	3	2	2
	MBS	MYB binding site involved in drought-inducibility	0	1	3	0	0	2	2	2	2
Phytohormone-related elements	TGA-element	auxin-responsive element	0	1	0	0	0	0	1	1	0
	TATC-box	cis-acting element involved in gibberellin-responsiveness	0	0	0	0	1	1	0	0	0
	TCA-element	cis-acting element involved in salicylic acid responsiveness	0	1	3	0	1	1	2	3	0
	ABRE	cis-acting element involved in the abscisic acid responsiveness	0	0	1	0	0	2	1	1	0
	CGTCA-motif	cis-acting regulatory element involved in the MeJA-responsiveness	2	1	0	2	0	0	0	0	1
	TGACG-motif	cis-acting regulatory element involved in the MeJA-responsiveness	2	1	0	2	0	0	0	0	1
	GARE-motif	gibberellin-responsive element	1	1	1	2	0	0	0	0	0
	P-box	gibberellin-responsive element	0	0	1	0	0	0	0	0	0
Cycle and circadian rhythms	circadian	cis-acting regulatory element involved in circadian control	0	1	0	1	0	0	0	0	0
Seed development	RY-element	cis-acting regulatory element involved in seed-specific regulation	2	1	0	0	0	0	3	3	0
Metabolism regulation	O2-site	cis-acting regulatory element involved in zein metabolism regulation	0	1	1	0	2	2	1	0	1
Others	Unnamed__1	60K protein binding site	0	0	0	0	0	0	2	2	0
	AT-rich element	binding site of AT-rich DNA binding protein (ATBP-1)	0	0	0	0	0	0	1	1	0
	CAT-box	cis-acting regulatory element related to meristem expression	0	0	0	0	0	3	3	2	0
	GCN4_motif	cis-regulatory element involved in endosperm expression	0	1	0	0	0	0	0	0	0
	AT-rich sequence	element for maximal elicitor-mediated activation (2copies)	0	0	0	0	0	1	0	0	0
	HD-Zip 1	element involved in differentiation of the palisade mesophyll cells	0	0	1	0	0	0	0	0	0
	GC-motif	enhancer-like element involved in anoxic specific inducibility	0	0	0	0	1	0	0	0	0
	Box III	protein binding site	0	0	0	0	1	0	0	0	0

## Sheet: Table S5
Table S5 Sequence primer for Vvi-miR399 gene family
Gene name	Sequence primer (5’- 3’)
VIT_213s0067g03280.1_F	ATGAGAAGGCAGCTGTAGAT
VIT_213s0067g03280.1_R	AGTCCCTAGAAGCTGAAGAC
VIT_217s0000g04480.1_F	GGAAGATGGGTTGCTGAAAT
VIT_217s0000g04480.1_R	GTGATCCCATGGTAGGAGAA
VIT_214s0006g02510.2_F	AGCTTGAAGCATACCAAAGG
VIT_214s0006g02510.2_R	CCGTGCTGTTTCTTCTGTAA
VIT_211s0052g01030.1_F	TTGCCATGTACCAAAGTAGC
VIT_211s0052g01030.1_R	TGGAATCAATTGCAGCATGA

## Sheet: Table S6
Table S6 Overexpression vectors construct primer sequence information
Gene name	Sequence primer (5’- 3’)
Vvi-MIR399d_F	ctctctctcaagcttggatccGTTCAAGATAAGGGAATAAAGCTTGTC
Vvi-MIR399d_R	gatacgaacgaaagctctagaGTGCATGGTTATATGGACTAAGCTTC
Vvi-MIR399e_F	ctctctctcaagcttggatccCATGGGGAATAAAGGGGTGG
Vvi-MIR399e_R	gatacgaacgaaagctctagaCTATTTACAGGTGCATTGAGATAATGTG
Vvi-MIR399f_F	ctctctctcaagcttggatccGTATATGAGAAGTTAAGGTATAGGGAATAAAG
Vvi-MIR399f_R	gatacgaacgaaagctctagaGAAGGATGTGCATACCAGGTGG
